# Supplementary material for: Mechanical and thermal properties of grain boundary in a planar heterostructure of graphene and hexagonal boron nitride
Source: Royal Society of Chemistry journal article supplement (doi:10.1039/c7nr07306b), 2017-12-26
Supplement: c7nr07306b1.pdf [file c7nr07306b1.pdf]

## Supplementary Information

### Mechanical and thermal properties of grain boundary in planar heterostructure of graphene and hexagonal boron nitride

Yinfeng Li<sup>a,b,\*</sup>, Anran Wei<sup>a</sup>, Han Ye<sup>c</sup>, Haimin Yao<sup>d</sup>

a. Department of Engineering Mechanics, School of Naval Architecture, Ocean and Civil Engineering (State Key Laboratory of Ocean Engineering), Shanghai Jiao Tong University, Shanghai 200240, China

b. Collaborative Innovation Center for Advanced Ship and Deep-Sea Exploration, Shanghai 200240, China

c. State Key Laboratory of Information Photonics and Optical Communications, Beijing University of Posts and Telecommunications, Beijing 100876, China

d. Department of Mechanical Engineering, The Hong Kong Polytechnic University, Hong Kong, China

**Video S1** Dynamic failure process of symmetric GB (4,2)|(3,3) under uniaxial tension along  $x$ -direction

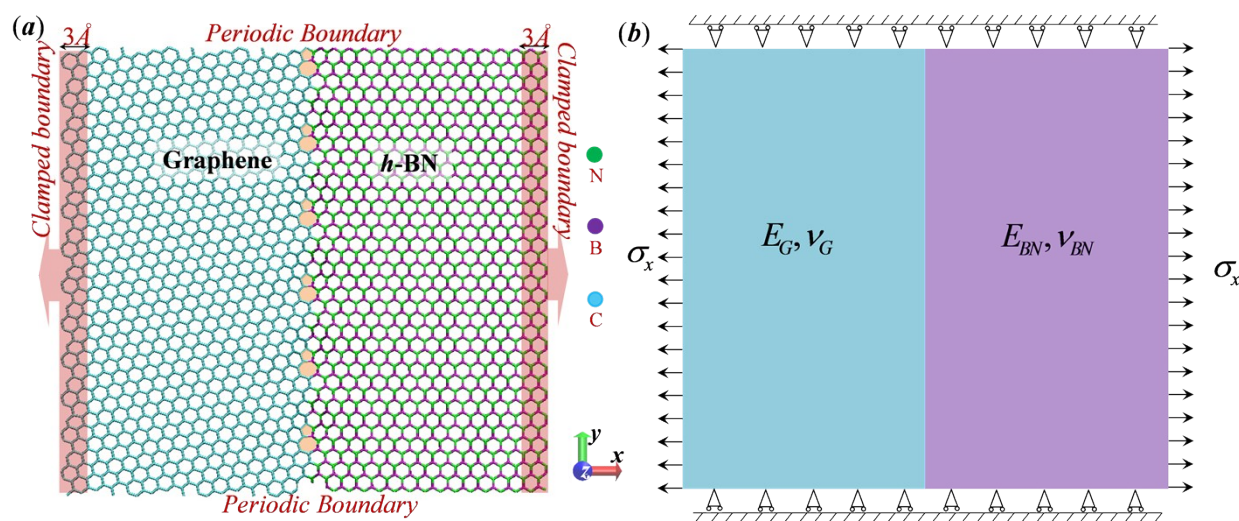

**Fig. S1** Illustration for the modelling of hybrid graphene/h-BN nanosheet under uniaxial tension along horizontal direction and periodic boundary condition along top and bottom direction. (a) shows the atomistic model for MD simulations, and (b) is the continuum model for the theoretical analysis based on classical disclination theory.

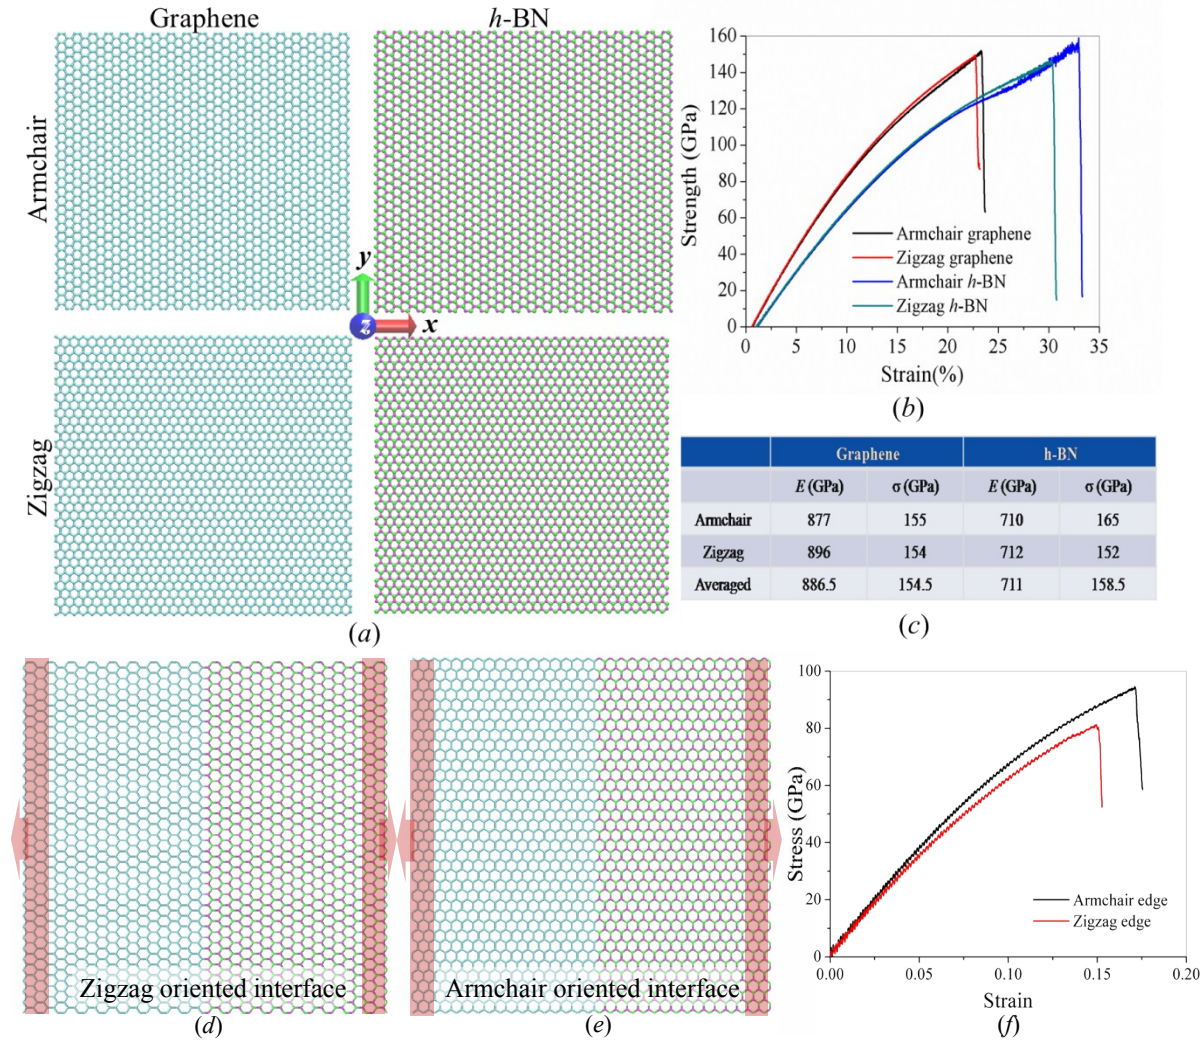

**Fig. S2. Verification of the Tersoff potential by simulating pure graphene and h-BN under tension.** (a) Molecular dynamic models of armchair- and zigzag oriented graphene and h-BN. (b) The stress–strain curves of pristine graphene and h-BN with tensile loading applied in armchair and zigzag directions, respectively. (c) Tensile strength and Young’s modulus obtained from the stress strain curves. (d-e) Molecular dynamic models of zigzag- and armchair oriented graphene/h-BN interfaces, and (f) the corresponding stress strain curves under uniaxial tension.

The stress-strain curves of in-plane heterostructure with zero mismatch angle between graphene and h-BN grains are calculated as shown in Fig S2. Both the mechanical properties of zigzag- and armchair-oriented graphene/h-BN interface, which have been reported by DFT

calculations in literature<sup>1</sup>, are considered using our MD models. Our calculations show that the armchair-oriented interface possesses higher Young's modulus and ultimate strength than that of the zigzag-oriented interface. The Young's moduli of the hybrid BNC heterostructure with zigzag- and armchair-oriented interface are 547 GPa and 714 GPa, which are consistent with the reported DFT results of 573 GPa and 744 GPa<sup>1</sup>. The ultimate strengths of zigzag and armchair edge interface are 81 GPa and 94 GPa, which also agree with the reported DFT results of 84 GPa and 95 GPa<sup>1</sup>. The comparisons indicate the acceptance of our molecular dynamics simulations

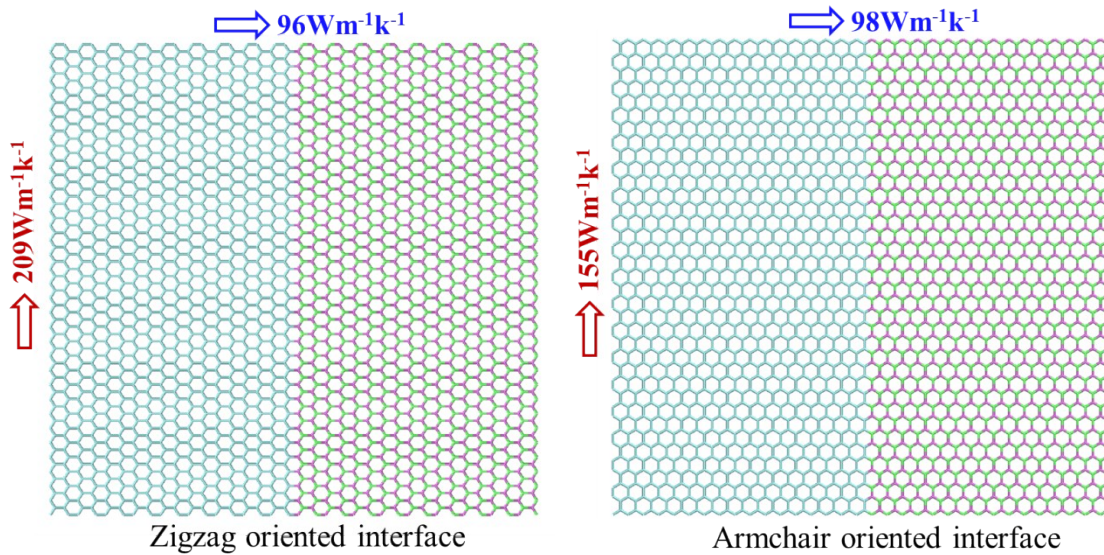

**Fig. S3.** The thermal transport coefficients parallel and perpendicular to the zigzag and armchair oriented graphene/*h*-BN interfaces.

## References

1. N. Ding, X. Chen and C.-M. L. Wu, *Sci. Rep.*, 2016, **6**, 31499.
